# Supplementary material
Source: PubMed Central journal article supplement (PMC8935131)
Supplement: NIHMS1782162-supplement-1782162_Sup_material.pdf [file NIHMS1782162-supplement-1782162_Sup_material.pdf]

## SUPPLEMENTAL INFORMATION

### **Ensemble cryo-electron microscopy reveals conformational states of the nsp13 helicase on the SARS-CoV-2 helicase replication-transcription complex**

**James Chen<sup>1,6</sup>, Qi Wang<sup>2,6</sup>, Brandon Malone<sup>1,6</sup>, Eliza Llewellyn<sup>1</sup>, Yakov Pechersky<sup>2</sup>, Kashyap Maruthi<sup>3</sup>, Ed T. Eng<sup>3</sup>, Jason K. Perry<sup>4</sup>, Elizabeth A. Campbell<sup>1</sup>, David E. Shaw<sup>2,5,7</sup>, Seth A. Darst<sup>1,7,8</sup>**

<sup>1</sup>Laboratory of Molecular Biophysics, The Rockefeller University, New York, NY 10065 USA.

<sup>2</sup>D. E. Shaw Research, New York, NY 10036 USA.

<sup>3</sup>The National Resource for Automated Molecular Microscopy, Simons Electron Microscopy Center, New York Structural Biology Center, New York, NY 10027 USA.

<sup>4</sup>Gilead Sciences, Inc., Foster City, CA 94404 USA.

<sup>5</sup>Department of Biochemistry and Biophysics, Columbia University, New York, NY 10032 USA.

<sup>6</sup>These authors contributed equally to this work.

<sup>7</sup>These authors jointly supervised this work. Correspondence to: David.Shaw@DEShawResearch.com; darst@rockefeller.edu

<sup>8</sup>Lead contact: darst@rockefeller.edu

Supplemental information includes 2 tables and 2 videos.

**Supplementary Table 1. Cryo-EM datasets of the nsp13-RTC.**

| Structural class                       | Dataset 1 <sup>1</sup> |                                     | Dataset 2     |     |                                     |
|----------------------------------------|------------------------|-------------------------------------|---------------|-----|-------------------------------------|
|                                        | particles (%)          | nominal resolution (Å) <sup>1</sup> | particles (%) | map | nominal resolution (Å) <sup>1</sup> |
| nsp13 <sub>1</sub> -RTC                | 17,345 (20%)           | 4.0                                 | 85,187 (20%)  | 2   | 3.2                                 |
| nsp13 <sub>2</sub> -RTC                | 58,942 (67%)           | 3.5                                 | 315,120 (72%) | 3   | 2.9                                 |
| (nsp13 <sub>2</sub> -RTC) <sub>2</sub> | 11,771 (13%)           | 7.9                                 | 35,392 (8%)   | 4   | 3.3                                 |
| total particles                        | 88,058                 |                                     | 435,699       |     |                                     |

<sup>1</sup>Gold-standard FSC calculated by RELION <sup>2</sup>.

**Supplementary Table 2. Comparison of nsp13<sub>2</sub>-BTC and nsp13<sub>2</sub>-RTC classes.**

| BTC-class <sup>a</sup> | particles     | resolution (Å) | rms_cur <sup>b</sup>                   | rmsd (Å) against nsp13 <sub>2</sub> -RTC class |                             |                              |         |
|------------------------|---------------|----------------|----------------------------------------|------------------------------------------------|-----------------------------|------------------------------|---------|
|                        |               |                |                                        | nsp13 <sub>T</sub> -apo                        | nsp13 <sub>T</sub> -engaged | nsp13 <sub>T</sub> -swiveled | 1B-open |
| class1                 | 22,132 (9.4%) | 4.1            | all                                    | 5.955                                          | 3.715                       | 9.071                        | 8.372   |
|                        |               |                | nsp13 <sub>T</sub> +nsp13 <sub>F</sub> | 8.748                                          | 5.421                       | 13.349                       | 12.306  |
|                        |               |                | nsp13 <sub>T</sub>                     | 7.8                                            | 1.493                       | 13.282                       | 10.941  |
| class2                 | 31,364 (13%)  | 4.0            |                                        |                                                |                             |                              |         |
| class3                 | 35,082 (15%)  | 3.9            | all                                    | 6.689                                          | 5.801                       | 8.325                        | 3.156   |
|                        |               |                | nsp13 <sub>T</sub> +nsp13 <sub>F</sub> | 9.888                                          | 8.551                       | 12.307                       | 4.614   |
|                        |               |                | nsp13 <sub>T</sub>                     | 13.211                                         | 11.201                      | 16.101                       | 1.716   |
| class4                 | 146,569 (62%) | 3.6            | all                                    | 4.626                                          | 0.685                       | 7.099                        | 6.246   |
|                        |               |                | nsp13 <sub>T</sub> +nsp13 <sub>F</sub> | 6.784                                          | 0.963                       | 10.466                       | 9.167   |
|                        |               |                | nsp13 <sub>T</sub>                     | 8.776                                          | 0.303                       | 13.057                       | 10.854  |

<sup>a</sup>Extended Data Fig. 8.

<sup>b</sup>After superimposition via the  $\alpha$ -carbons of nsp12, the nsp13<sub>2</sub>-BTC components listed in this column were compared with the same components of the nsp13<sub>2</sub>-RTC class using the PyMOL rms\_cur command.

## Supplemental Videos

**Supplementary Video 1. Opening of nsp13<sub>T</sub>-RecA domains in nsp13<sub>T</sub>-apo vs nsp13<sub>T</sub>-engaged states. Related to Fig. 4.** The video compares the disposition of the nsp13<sub>T</sub> RecA domains in the nsp13<sub>T</sub>-engaged vs. the nsp13<sub>T</sub>-apo state. In the nsp13<sub>T</sub>-engaged state, the RecA domains are closed onto the substrate RNA and bound to ADP-AlF<sub>3</sub>, a non-hydrolyzable ATP analog. In the nsp13<sub>T</sub>-apo state, the RecA2 domain is rotated open by ~21°, resulting in a translation of the separation between the RecA1 and RecA2 centers-of-gravity by 3.4 Å. The video shows how this conformational change is related to an inchworming model for nsp13<sub>T</sub> translocation, and illustrated how nsp13<sub>T</sub> translocation drives backtracking of the RTC.

**Supplementary Video 2. Structural overview of the nsp13<sub>2</sub>-RTC and the nsp13<sub>T</sub>-engaged, nsp13<sub>T</sub>-open, and nsp13<sub>T</sub>-swiveled states. Related to Figs. 2, 3, 5, and 7.** The video highlights the nsp13<sub>T</sub> conformational changes between the nsp13<sub>T</sub>-engaged, nsp13<sub>T</sub>-swiveled, and nsp13<sub>T</sub>-open states.

## References

1. Chen, J. *et al.* Structural basis for helicase-polymerase coupling in the SARS-CoV-2 replication-transcription complex. *Cell* 182, 1560-1573.e13 (2020).
2. Zivanov, J. *et al.* New tools for automated high-resolution cryo-EM structure determination in RELION-3. *eLife* 7, (2018).
3. Cardone, G., Heymann, J. B. & Steven, A. C. One number does not fit all: mapping local variations in resolution in cryo-EM reconstructions. *Journal of structural biology* 184, 226–236 (2013).
4. Tan, Y. Z. *et al.* Addressing preferred specimen orientation in single-particle cryo-EM through tilting. *Nature methods* 14, 793–796 (2017).
5. Punjani, A., Rubinstein, J. L., Fleet, D. J. & Brubaker, M. A. cryoSPARC: algorithms for rapid unsupervised cryo-EM structure determination. *Nat Methods* 14, 290–296 (2017).
6. Malone, B. *et al.* Structural basis for backtracking by the SARS-CoV-2 replication–transcription complex. *Proc National Acad Sci* 118, e2102516118 (2021).
